# Supplementary material for: Plasma sphingolipids in HIV-associated chronic obstructive pulmonary disease
Source: PubMed Central journal article supplement (PMC5387954; doi:10.1136/bmjresp-2017-000180), 2017-04-03
Supplement: bmjresp-2017-000180supp_table2.pdf [file bmjresp-2017-000180supp_table2.pdf]

Table 2S. MS/MS fragmentation data

SPECTRUM - MS

Wendt\_Inclu\_list\_redo\_20160328\_31.raw

FTMS + p ESI d Full ms2 245.23@hcd37.50 [50.00-270.00]

Scan #: 8905

RT: 18.58

| m/z       | Intensity | Relative |
|-----------|-----------|----------|
| 55.05505  | 471434.8  | 18.79    |
| 57.07071  | 458488.4  | 18.27    |
| 67.05497  | 1544264   | 61.54    |
| 69.0706   | 779517.4  | 31.07    |
| 79.05485  | 1222039.6 | 48.7     |
| 81.07049  | 1976794.3 | 78.78    |
| 83.08608  | 351587.6  | 14.01    |
| 91.05473  | 1924314.6 | 76.69    |
| 93.07038  | 1882180.9 | 75.01    |
| 95.08599  | 2226375.3 | 88.73    |
| 105.07024 | 1675198.5 | 66.76    |
| 107.08586 | 1395408.1 | 55.61    |
| 109.1015  | 874657.4  | 34.86    |
| 119.08576 | 1727771.8 | 68.86    |
| 121.10138 | 1617620.5 | 64.47    |
| 123.11704 | 324337.7  | 12.93    |
| 133.10126 | 2509214.8 | 100      |
| 135.11688 | 774607.5  | 30.87    |
| 137.13245 | 201871.9  | 8.05     |
| 147.11682 | 1891404.3 | 75.38    |
| 149.13251 | 745051.9  | 29.69    |
| 151.1479  | 138141.4  | 5.51     |
| 161.13251 | 1909263.6 | 76.09    |
| 163.14812 | 916929.5  | 36.54    |
| 175.14815 | 1212218.6 | 48.31    |
| 177.16374 | 251280.5  | 10.01    |
| 189.1637  | 528438.4  | 21.06    |
| 203.17915 | 224742.4  | 8.96     |
| 245.22629 | 2426380.8 | 96.7     |
| 246.22997 | 291003.7  | 11.6     |

SPECTRUM - MS

Wendt\_Inclu\_list\_redo\_20160328\_31.raw

FTMS + p ESI d Full ms2 262.25@hcd37.50 [50.00-275.00]

Scan #: 8456

RT: 17.25

| m/z       | Intensity | Relative |
|-----------|-----------|----------|
| 55.05506  | 350376.8  | 14.43    |
| 57.07074  | 154996.2  | 9.37     |
| 67.05497  | 1140686   | 47       |
| 69.0706   | 349273.9  | 13       |
| 79.05483  | 1615484.3 | 78       |
| 81.0705   | 1384085.3 | 57.85    |
| 83.08616  | 222712.9  | 10.31    |
| 91.05475  | 678658.5  | 29.1     |
| 93.07037  | 2328349.3 | 89       |
| 95.0856   | 1239898.4 | 50       |
| 105.07021 | 544212.8  | 20.23    |
| 107.08588 | 1611189.5 | 100      |
| 109.10152 | 508754.1  | 22.98    |
| 117.07021 | 199925.4  | 7.36     |
| 119.08572 | 506725.4  | 23.65    |
| 121.10137 | 1397288   | 66.66    |
| 123.11692 | 168782.3  | 7.25     |
| 131.0856  | 538077.3  | 25.11    |
| 133.10126 | 436935.7  | 20.23    |
| 135.11687 | 1152479.8 | 51.68    |
| 145.10112 | 461877.6  | 23.65    |
| 147.11673 | 355800.4  | 18.78    |
| 149.13254 | 755761.2  | 37.25    |
| 159.11685 | 351236    | 8.05     |
| 161.13246 | 396522.4  | 16.56    |
| 163.14812 | 467648.5  | 21.12    |
| 175.14815 | 322532.4  | 13.86    |
| 189.16101 | 194315.9  | 7.52     |
| 245.22543 | 599539.1  | 25.25    |
| 262.25198 | 915995.3  | 10.02    |

SPECTRUM - MS

Wendt\_Inclu\_list\_redo\_20160328\_31.raw

FTMS + p ESI d Full ms2 261.22@hcd37.50 [50.00-285.00]

Scan #: 8321

RT: 17.37

| m/z       | Intensity | Relative |
|-----------|-----------|----------|
| 55.05506  | 350376.8  | 15.05    |
| 57.07074  | 154996.2  | 6.66     |
| 67.05497  | 1140686   | 48.99    |
| 69.07059  | 349273.9  | 15       |
| 79.05485  | 1615484.3 | 69.38    |
| 81.07048  | 1384085.3 | 59.44    |
| 83.08616  | 222712.9  | 9.57     |
| 91.05473  | 678658.5  | 29.15    |
| 93.07037  | 2328349.3 | 100      |
| 95.08598  | 1239898.4 | 53.25    |
| 105.07021 | 544212.8  | 23.37    |
| 107.08588 | 1611189.5 | 69.2     |
| 109.10152 | 508754.1  | 21.85    |
| 117.07021 | 199925.4  | 8.59     |
| 119.08572 | 506725.4  | 21.76    |
| 121.10137 | 1397288   | 60.01    |
| 123.11692 | 168782.3  | 7.25     |
| 131.0856  | 538077.3  | 23.11    |
| 133.10126 | 436935.7  | 18.77    |
| 135.11687 | 1152479.8 | 49.5     |
| 145.10112 | 461877.6  | 19.84    |
| 147.11673 | 355800.4  | 15.28    |
| 149.13254 | 755761.2  | 32.46    |
| 159.11685 | 351236    | 15.09    |
| 161.13246 | 396522.4  | 17.03    |
| 163.14812 | 467648.5  | 20.08    |
| 173.13249 | 322532.4  | 13.85    |
| 187.14799 | 194315.9  | 8.35     |
| 243.21068 | 599539.1  | 25.75    |
| 261.2211  | 915995.3  | 39.34    |

SPECTRUM - MS

Wendt\_Inclu\_list\_redo\_20160328\_31.raw

FTMS + p ESI d Full ms2 263.24@hcd37.50 [50.00-285.00]

Scan #: 8925

RT: 18.62

| m/z       | Intensity | Relative |
|-----------|-----------|----------|
| 55.05508  | 2959040   | 11.47    |
| 57.07071  | 3014287.5 | 11.69    |
| 67.05499  | 21366134  | 82.85    |
| 69.07064  | 3495329   | 13.55    |
| 71.0864   | 1446568.4 | 5.61     |
| 79.05491  | 4915134   | 19.06    |
| 81.07051  | 25789230  | 100      |
| 83.08609  | 3032472.8 | 11.76    |
| 91.05467  | 3185067.8 | 12.35    |
| 93.07042  | 5631352   | 21.84    |
| 95.08604  | 23359914  | 90.58    |
| 97.06515  | 1287868.5 | 4.99     |
| 97.10139  | 1358277.3 | 5.27     |
| 99.0809   | 1439258.3 | 5.58     |
| 105.07028 | 2556833.8 | 9.91     |
| 107.08591 | 3622538   | 14.05    |
| 109.10152 | 12259571  | 47.54    |
| 119.08588 | 2761468.5 | 10.71    |
| 121.1014  | 3439529.3 | 13.34    |
| 123.11703 | 4521524.5 | 17.53    |
| 133.10121 | 3376571.5 | 13.09    |
| 135.11693 | 2432434   | 9.43     |
| 137.13225 | 2073119.8 | 8.04     |
| 147.11687 | 2554438.3 | 9.91     |
| 149.13251 | 1541391.6 | 5.98     |
| 151.14825 | 1410562.6 | 5.47     |
| 161.1326  | 1899247.4 | 7.36     |
| 175.14832 | 1625126.5 | 6.3      |
| 245.22658 | 2705231.3 | 10.49    |
| 263.23712 | 4750515   | 18.42    |

SPECTRUM - MS

Wendt\_Inclu\_list\_redo\_20160328\_31.raw

FTMS + p ESI d Full ms2 268.26@hcd37.50 [50.00-290.00]

Scan #: 9085

RT: 18.95

| m/z       | Intensity | Relative |
|-----------|-----------|----------|
| 55.05507  | 3238864.8 | 59.52    |
| 57.07071  | 3007378.8 | 55.27    |
| 67.05497  | 1255715.9 | 23.08    |
| 69.07061  | 5441449.5 | 100      |
| 71.08624  | 1589165.8 | 29.2     |
| 72.08147  | 516396.1  | 9.49     |
| 79.05489  | 731414.6  | 13.44    |
| 81.0705   | 2169666.3 | 39.87    |
| 83.08612  | 4473140   | 82.2     |
| 85.1018   | 665937.7  | 12.24    |
| 86.0606   | 840645.3  | 15.45    |
| 93.0704   | 1339954.5 | 24.62    |
| 95.08601  | 2187015   | 40.19    |
| 97.06529  | 1149839.3 | 21.13    |
| 97.10165  | 3659412.3 | 67.25    |
| 100.07616 | 1391877.9 | 25.58    |
| 107.08592 | 1087283.1 | 19.98    |
| 109.10152 | 1002318.6 | 18.42    |
| 111.08078 | 939313.4  | 17.26    |
| 111.11717 | 1178814.1 | 21.66    |
| 114.09169 | 1172487.1 | 21.55    |
| 121.10138 | 1358247.3 | 24.96    |
| 123.11705 | 435035.7  | 7.99     |
| 125.09628 | 574080.8  | 10.55    |
| 128.10709 | 547783.2  | 10.07    |
| 135.11684 | 1299076.3 | 23.87    |
| 149.13251 | 770392    | 14.16    |
| 163.14806 | 415102.3  | 7.63     |
| 233.22632 | 610211.1  | 11.21    |
| 268.26303 | 558135.3  | 10.26    |

SPECTRUM - MS

Wendt\_Inclu\_list\_redo\_20160328\_31.raw

FTMS + p ESI d Full ms2 270.28@hcd37.50 [50.00-295.00]

Scan #: 9652

RT: 20.13

| m/z       | Intensity | Relative |
|-----------|-----------|----------|
| 55.05512  | 23695.5   | 2.11     |
| 57.03433  | 5515.9    | 0.49     |
| 57.07073  | 166840.3  | 14.86    |
| 67.05499  | 10555.3   | 0.94     |
| 69.07059  | 37673.3   | 3.36     |
| 71.04987  | 8622.4    | 0.77     |
| 71.08623  | 69955.5   | 6.23     |
| 74.06071  | 70598.5   | 6.29     |
| 81.07035  | 11452.1   | 1.02     |
| 83.08616  | 30152.8   | 2.69     |
| 85.10161  | 24990     | 2.23     |
| 86.06052  | 15602.4   | 1.39     |
| 88.07623  | 282442.3  | 25.16    |
| 95.08569  | 15909.8   | 1.42     |
| 97.06534  | 8890      | 0.79     |
| 97.10165  | 22307.3   | 1.99     |
| 100.07623 | 20044.6   | 1.79     |
| 102.09173 | 164385    | 14.65    |
| 103.09506 | 5565.1    | 0.5      |
| 109.10154 | 10290.6   | 0.92     |
| 114.09167 | 10870.6   | 0.97     |
| 116.10729 | 59601.3   | 5.31     |
| 130.1226  | 20478     | 1.82     |
| 144.13844 | 11700.4   | 1.04     |
| 186.18599 | 8306.3    | 0.74     |
| 200.20105 | 5229      | 0.47     |
| 214.21666 | 9907.4    | 0.88     |
| 229.23573 | 10729.2   | 0.96     |
| 270.27902 | 1122454.9 | 100      |
| 271.28241 | 148581.7  | 13.24    |

SPECTRUM - MS

Wendt\_Inclu\_list\_redo\_20160328\_31.raw

FTMS + p ESI d Full ms2 280.26@hcd37.50 [50.00-305.00]

Scan #: 8910

RT: 18.59

| m/z       | Intensity | Relative |
|-----------|-----------|----------|
| 55.05507  | 99185280  | 54.75    |
| 57.07072  | 45904444  | 25.34    |
| 67.05499  | 113930672 | 62.89    |
| 69.07062  | 133580344 | 73.73    |
| 71.08622  | 17224392  | 9.51     |
| 79.05488  | 26980374  | 14.89    |
| 81.0705   | 170047152 | 93.86    |
| 83.08613  | 98200344  | 54.2     |
| 91.05477  | 30034526  | 16.58    |
| 93.0704   | 45853148  | 25.31    |
| 95.08601  | 181167776 | 100      |
| 97.06524  | 21168044  | 11.68    |
| 97.10164  | 64155436  | 35.41    |
| 100.07614 | 29140808  | 16.08    |
| 105.07024 | 25809042  | 14.25    |
| 107.08588 | 35091176  | 19.37    |
| 109.10153 | 99728984  | 55.05    |
| 111.08076 | 20361088  | 11.24    |
| 114.0916  | 24237816  | 13.38    |
| 119.0858  | 31458360  | 17.36    |
| 121.10144 | 36962676  | 20.4     |
| 123.11705 | 44919936  | 24.79    |
| 133.10127 | 39909800  | 22.03    |
| 135.11693 | 24342552  | 13.44    |
| 147.11687 | 30714704  | 16.95    |

SPECTRUM - MS

Wendt\_Inclu\_list\_redo\_20160328\_31.raw

FTMS + p ESI d Full ms2 293.28@hcd37.50 [50.00-320.00]

Scan #: 10494

RT: 21.90

| m/z       | Intensity | Relative |
|-----------|-----------|----------|
| 55.05508  | 771679.6  | 61.76    |
| 57.03432  | 48693.8   | 3.9      |
| 57.07071  | 392911.3  | 31.45    |
| 67.05499  | 559444.7  | 44.78    |
| 69.07062  | 1249380.6 | 100      |
| 71.04984  | 59260.9   | 4.74     |
| 71.08624  | 184236.9  | 14.75    |
| 79.05483  | 197219.3  | 15.79    |
| 81.0705   | 849618.6  | 68       |
| 83.08613  | 959176.6  | 76.77    |
| 85.06541  | 62202.4   | 4.98     |
| 85.10181  | 107829.7  | 8.63     |
| 93.07038  | 306322.3  | 24.52    |
| 95.08601  | 912709.1  | 73.05    |
| 97.06528  | 110026.6  | 8.81     |
| 97.10164  | 752515.2  | 60.23    |
| 99.08076  | 67057.9   | 5.37     |
| 107.0859  | 250977.4  | 20.09    |
| 109.10149 | 482868.5  | 38.65    |
| 111.08083 | 128161.9  | 10.26    |
| 111.11718 | 233675    | 18.7     |
| 121.10141 | 373955.5  | 29.93    |
| 123.11707 | 203712.8  | 16.31    |
| 125.09634 | 52709.5   | 4.22     |
| 125.13284 | 40082.2   | 3.21     |
| 135.1169  | 359041.4  | 28.74    |
| 137.13258 | 66765.5   | 5.34     |
| 149.13255 | 175239.6  | 14.03    |
| 163.14803 | 80713     | 6.46     |
| 275.27319 | 138096.9  | 11.05    |



SPECTRUM - MS

Wendt\_Inclu\_list\_redo\_20160328\_31.raw

FTMS + p ESI d Full ms2 296.26@hcd37.50 [50.00-320.00]

Scan #: 7675

RT: 16.01

| m/z       | Intensity | Relative |
|-----------|-----------|----------|
| 55.01869  | 398281.5  | 21.72    |
| 55.05507  | 717448.9  | 39.13    |
| 57.07071  | 1542926.1 | 84.16    |
| 67.05498  | 1479151.4 | 80.68    |
| 69.07059  | 940311    | 51.29    |
| 79.05486  | 952725.1  | 51.97    |
| 81.0705   | 1833363.9 | 100      |
| 83.08611  | 1119458.9 | 61.06    |
| 91.05473  | 264705.7  | 14.44    |
| 93.07038  | 1420831.6 | 77.5     |
| 95.086    | 1717963.3 | 93.71    |
| 97.06525  | 265688.1  | 14.49    |
| 97.10159  | 420772.8  | 22.95    |
| 105.07028 | 157897.7  | 8.61     |
| 107.08588 | 1261287.6 | 68.8     |
| 109.10152 | 912937.1  | 49.8     |
| 111.0807  | 184457.4  | 10.06    |
| 119.08572 | 193296    | 10.54    |
| 121.10139 | 1536457.9 | 83.81    |
| 123.117   | 256531.6  | 13.99    |
| 127.11192 | 431114.8  | 23.51    |
| 135.11688 | 1190330.3 | 64.93    |
| 137.13255 | 179254.7  | 9.78     |
| 149.13251 | 462033.7  | 25.2     |
| 167.1431  | 371233.4  | 20.25    |
| 169.12233 | 589048.8  | 32.13    |
| 233.22633 | 414900.9  | 22.63    |
| 243.21063 | 142230.8  | 7.76     |
| 261.22113 | 176469.7  | 9.63     |
| 279.23206 | 135914.1  | 7.41     |

SPECTRUM - MS

Wendt\_Inclu\_list\_redo\_20160328\_31.raw

FTMS + p ESI d Full ms2 306.28@hcd37.50 [50.00-330.00]

Scan #: 9161

RT: 19.11

| m/z       | Intensity | Relative |
|-----------|-----------|----------|
| 55.05516  | 19909.5   | 14.25    |
| 57.07071  | 11845.6   | 8.48     |
| 67.05501  | 101240.9  | 72.44    |
| 69.07064  | 28277.3   | 20.23    |
| 79.05474  | 21733.3   | 15.55    |
| 81.07052  | 132501.3  | 94.8     |
| 83.08615  | 23609.4   | 16.89    |
| 91.05482  | 12328.9   | 8.82     |
| 93.07034  | 29694.9   | 21.25    |
| 95.08605  | 139764.4  | 100      |
| 97.06503  | 4779.1    | 3.42     |
| 97.10146  | 4106.2    | 2.94     |
| 100.07624 | 3649.9    | 2.61     |
| 105.07014 | 12221.6   | 8.74     |
| 107.08595 | 31248     | 22.36    |
| 109.10162 | 73544.2   | 52.62    |
| 114.09191 | 4189      | 3        |
| 119.08567 | 13518.7   | 9.67     |
| 121.10154 | 30816.3   | 22.05    |
| 123.11712 | 24028.5   | 17.19    |
| 131.08553 | 11090.5   | 7.94     |
| 133.10085 | 12254.1   | 8.77     |
| 135.1167  | 25161     | 18       |
| 137.13245 | 11217.6   | 8.03     |
| 145.10112 | 10499.1   | 7.51     |
| 147.11719 | 4424.9    | 3.17     |
| 149.13245 | 10254.6   | 7.34     |
| 159.11714 | 4460.7    | 3.19     |
| 163.14821 | 4984.8    | 3.57     |
| 173.13194 | 3719.7    | 2.66     |

SPECTRUM - MS

Wendt\_Inclu\_list\_redo\_20160328\_31.raw

FTMS + p ESI d Full ms2 310.31@hcd37.50 [50.00-335.00]

Scan #: 10489

RT: 21.89

| m/z       | Intensity | Relative |
|-----------|-----------|----------|
| 55.01867  | 3246148.8 | 4.39     |
| 55.05507  | 40513496  | 54.79    |
| 57.07071  | 46038352  | 62.26    |
| 58.06598  | 1942812.9 | 2.63     |
| 67.05498  | 18508918  | 25.03    |
| 69.03421  | 1821665.6 | 2.46     |
| 69.07061  | 73945576  | 100      |
| 71.04982  | 2240175.8 | 3.03     |
| 71.08624  | 26545430  | 35.9     |
| 72.04516  | 3308114.8 | 4.47     |
| 72.08147  | 6610563   | 8.94     |
| 79.05486  | 9796514   | 13.25    |
| 81.07049  | 32587274  | 44.07    |
| 83.04978  | 3650415.8 | 4.94     |
| 83.08611  | 61130828  | 82.67    |
| 85.06532  | 2299939   | 3.11     |
| 85.10177  | 11836313  | 16.01    |
| 86.06062  | 9084905   | 12.29    |
| 86.09702  | 3180548.5 | 4.3      |
| 93.07037  | 17767286  | 24.03    |
| 95.08601  | 32506724  | 43.96    |
| 97.06526  | 17532448  | 23.71    |
| 97.10162  | 48729528  | 65.9     |
| 100.07612 | 19152122  | 25.9     |
| 107.08588 | 18516182  | 25.04    |
| 109.10152 | 17474340  | 23.63    |
| 111.08076 | 14653087  | 19.82    |
| 111.11716 | 17191728  | 23.25    |
| 114.09162 | 15231963  | 20.6     |
| 121.1014  | 19599054  | 26.5     |
| 123.11695 | 7733754   | 10.46    |
| 125.09624 | 9572922   | 12.95    |
| 125.13274 | 3813877.3 | 5.16     |
| 128.10709 | 6968357.5 | 9.42     |
| 135.11687 | 20678120  | 27.96    |
| 137.13246 | 2836658   | 3.84     |
| 139.11183 | 5335651   | 7.22     |
| 142.1228  | 3831066.3 | 5.18     |

|           |           |       |
|-----------|-----------|-------|
| 149.13254 | 12852356  | 17.38 |
| 153.12747 | 3111889.8 | 4.21  |
| 156.13866 | 2430454.8 | 3.29  |
| 163.14813 | 6451422   | 8.72  |
| 167.14333 | 2174728.5 | 2.94  |
| 177.16377 | 3241683   | 4.38  |
| 191.1792  | 1832200.6 | 2.48  |
| 205.19453 | 1836401   | 2.48  |
| 268.2995  | 2343487.5 | 3.17  |
| 275.2731  | 5915956.5 | 8     |
| 293.28433 | 3799693.5 | 5.14  |
| 310.31003 | 4940572   | 6.68  |

SPECTRUM - MS

Wendt\_Inclu\_list\_redo\_20160328\_31.raw

FTMS + p ESI d Full ms2 310.31@hcd37.50 [50.00-335.00]

Scan #: 10489

RT: 21.89

| m/z       | Intensity | Relative |
|-----------|-----------|----------|
| 55.01867  | 3246148.8 | 4.39     |
| 55.05507  | 40513496  | 54.79    |
| 57.07071  | 46038352  | 62.26    |
| 58.06598  | 1942812.9 | 2.63     |
| 67.05498  | 18508918  | 25.03    |
| 69.03421  | 1821665.6 | 2.46     |
| 69.07061  | 73945576  | 100      |
| 71.04982  | 2240175.8 | 3.03     |
| 71.08624  | 26545430  | 35.9     |
| 72.04516  | 3308114.8 | 4.47     |
| 72.08147  | 6610563   | 8.94     |
| 79.05486  | 9796514   | 13.25    |
| 81.07049  | 32587274  | 44.07    |
| 83.04978  | 3650415.8 | 4.94     |
| 83.08611  | 61130828  | 82.67    |
| 85.06532  | 2299939   | 3.11     |
| 85.10177  | 11836313  | 16.01    |
| 86.06062  | 9084905   | 12.29    |
| 86.09702  | 3180548.5 | 4.3      |
| 93.07037  | 17767286  | 24.03    |
| 95.08601  | 32506724  | 43.96    |
| 97.06526  | 17532448  | 23.71    |
| 97.10162  | 48729528  | 65.9     |
| 100.07612 | 19152122  | 25.9     |
| 107.08588 | 18516182  | 25.04    |
| 109.10152 | 17474340  | 23.63    |
| 111.08076 | 14653087  | 19.82    |
| 111.11716 | 17191728  | 23.25    |
| 114.09162 | 15231963  | 20.6     |
| 121.1014  | 19599054  | 26.5     |
| 123.11695 | 7733754   | 10.46    |
| 125.09624 | 9572922   | 12.95    |
| 125.13274 | 3813877.3 | 5.16     |
| 128.10709 | 6968357.5 | 9.42     |
| 135.11687 | 20678120  | 27.96    |
| 137.13246 | 2836658   | 3.84     |
| 139.11183 | 5335651   | 7.22     |
| 142.1228  | 3831066.3 | 5.18     |

|           |           |       |
|-----------|-----------|-------|
| 149.13254 | 12852356  | 17.38 |
| 153.12747 | 3111889.8 | 4.21  |
| 156.13866 | 2430454.8 | 3.29  |
| 163.14813 | 6451422   | 8.72  |
| 167.14333 | 2174728.5 | 2.94  |
| 177.16377 | 3241683   | 4.38  |
| 191.1792  | 1832200.6 | 2.48  |
| 205.19453 | 1836401   | 2.48  |
| 268.2995  | 2343487.5 | 3.17  |
| 275.2731  | 5915956.5 | 8     |
| 293.28433 | 3799693.5 | 5.14  |
| 310.31003 | 4940572   | 6.68  |

SPECTRUM - MS

Wendt\_Inclu\_list\_redo\_20160328\_31.raw

FTMS + p ESI d Full ms2 338.34@hcd37.50 [50.00-365.00]

Scan #: 11544

RT: 24.11

| m/z       | Intensity | Relative |
|-----------|-----------|----------|
| 53.00301  | 330071.3  | 2.63     |
| 55.01865  | 487090.7  | 3.88     |
| 55.05505  | 6376767   | 50.79    |
| 57.03427  | 286561.9  | 2.28     |
| 57.07069  | 8029530   | 63.95    |
| 58.06591  | 303421    | 2.42     |
| 67.05495  | 3234627.5 | 25.76    |
| 69.07057  | 12556307  | 100      |
| 70.0658   | 283132    | 2.25     |
| 71.04978  | 405446.9  | 3.23     |
| 71.0862   | 4980629   | 39.67    |
| 72.04508  | 497024.8  | 3.96     |
| 72.08144  | 1043826.6 | 8.31     |
| 79.05483  | 1603783.6 | 12.77    |
| 81.07046  | 5542128   | 44.14    |
| 83.04964  | 655866    | 5.22     |
| 83.08607  | 10467673  | 83.37    |
| 85.06535  | 355199.9  | 2.83     |
| 85.10171  | 2201352.3 | 17.53    |
| 86.06056  | 1764423.5 | 14.05    |
| 86.09694  | 512123.4  | 4.08     |
| 91.05464  | 309770.1  | 2.47     |
| 93.07033  | 3271885   | 26.06    |
| 95.08597  | 5933131.5 | 47.25    |
| 97.06522  | 2783424.8 | 22.17    |
| 97.10158  | 8150375   | 64.91    |
| 100.07606 | 3019460   | 24.05    |
| 107.08584 | 3031829.5 | 24.15    |
| 109.10146 | 3298934.5 | 26.27    |
| 111.0807  | 2409507.5 | 19.19    |
| 111.11708 | 2882569   | 22.96    |
| 114.09157 | 2632048.3 | 20.96    |
| 121.10133 | 3431572.5 | 27.33    |
| 123.11696 | 1470309.3 | 11.71    |
| 125.09623 | 1561222.6 | 12.43    |
| 125.13262 | 642877.6  | 5.12     |
| 128.10704 | 1286367.3 | 10.24    |
| 135.11679 | 3549902.5 | 28.27    |

|           |           |       |
|-----------|-----------|-------|
| 137.13248 | 456832.5  | 3.64  |
| 139.11166 | 1040130.1 | 8.28  |
| 142.12253 | 676536.9  | 5.39  |
| 149.13245 | 2129683.3 | 16.96 |
| 153.12732 | 507996    | 4.05  |
| 156.13823 | 421720    | 3.36  |
| 163.14807 | 1066080   | 8.49  |
| 177.16374 | 563778.9  | 4.49  |
| 191.17931 | 345935.9  | 2.76  |
| 303.30426 | 702988.2  | 5.6   |
| 321.31464 | 522382.8  | 4.16  |
| 338.34134 | 618028.2  | 4.92  |



SPECTRUM - MS

Wendt\_Inclu\_list\_redo\_20160328\_31.raw

FTMS + p ESI d Full ms2 340.36@hcd37.50 [50.00-365.00]

Scan #: 12579

RT: 26.31

| m/z       | Intensity | Relative |
|-----------|-----------|----------|
| 55.05508  | 3463.2    | 13.28    |
| 55.07224  | 1946.8    | 7.47     |
| 57.07066  | 13584.3   | 52.09    |
| 69.07065  | 3543.8    | 13.59    |
| 71.08612  | 5380      | 20.63    |
| 72.08136  | 2297.9    | 8.81     |
| 74.06071  | 4746.7    | 18.2     |
| 75.43996  | 2281.7    | 8.75     |
| 75.98248  | 2297.8    | 8.81     |
| 78.2285   | 2594.8    | 9.95     |
| 83.08597  | 2598.5    | 9.96     |
| 87.50589  | 2126.6    | 8.15     |
| 88.07626  | 26077.8   | 100      |
| 95.08584  | 2877.3    | 11.03    |
| 102.09182 | 14696     | 56.35    |
| 112.78008 | 2075.3    | 7.96     |
| 116.10724 | 3806.7    | 14.6     |
| 143.15794 | 1967.9    | 7.55     |
| 148.0798  | 2039.2    | 7.82     |
| 204.05232 | 2222.8    | 8.52     |
| 235.38141 | 2340.7    | 8.98     |
| 270.83597 | 2104.7    | 8.07     |

SPECTRUM - MS

Wendt\_Inclu\_list\_redo\_20160328\_31.raw

FTMS + p ESI d Full ms2 560.33@hcd37.50 [50.00-590.00]

Scan #: 6129

RT: 12.77

| m/z       | Intensity | Relative |
|-----------|-----------|----------|
| 53.89408  | 2969.9    | 0.34     |
| 56.05028  | 2807.9    | 0.32     |
| 58.06609  | 14678.6   | 1.67     |
| 58.27049  | 2481.3    | 0.28     |
| 60.08158  | 143525.1  | 16.32    |
| 67.05499  | 12228.7   | 1.39     |
| 71.07369  | 40050.6   | 4.55     |
| 79.05513  | 5634.3    | 0.64     |
| 81.07063  | 6596.7    | 0.75     |
| 81.26362  | 3059.5    | 0.35     |
| 82.45902  | 2859      | 0.33     |
| 86.09699  | 390280.8  | 44.37    |
| 88.37608  | 3067.2    | 0.35     |
| 91.05455  | 21506.5   | 2.44     |
| 93.07024  | 6572.1    | 0.75     |
| 98.98455  | 18589.7   | 2.11     |
| 104.10739 | 756135.4  | 85.96    |
| 104.4232  | 2963.6    | 0.34     |
| 105.07035 | 3895.5    | 0.44     |
| 117.0703  | 12457.5   | 1.42     |
| 125.00002 | 183399.1  | 20.85    |
| 131.08568 | 7199.5    | 0.82     |
| 143.52794 | 4322.7    | 0.49     |
| 145.10049 | 4105.7    | 0.47     |
| 181.02577 | 5415.7    | 0.62     |
| 184.07336 | 879654.4  | 100      |
| 244.58902 | 4404.1    | 0.5      |
| 268.4704  | 3213.6    | 0.37     |
| 275.28009 | 2982.9    | 0.34     |
| 332.67633 | 2789.7    | 0.32     |

SPECTRUM - MS

Wendt\_Inclu\_list\_redo\_20160328\_31.raw

FTMS + p ESI d Full ms2 613.49@hcd37.50 [50.00-645.00]

Scan #: 7471

RT: 15.58

| m/z       | Intensity | Relative |
|-----------|-----------|----------|
| 51.73846  | 2472.5    | 0.17     |
| 56.26662  | 2441.4    | 0.17     |
| 60.90975  | 2955.7    | 0.2      |
| 76.87393  | 2858.3    | 0.2      |
| 80.95065  | 2836.7    | 0.19     |
| 83.54897  | 2646.8    | 0.18     |
| 97.2464   | 2624.4    | 0.18     |
| 117.74433 | 2569      | 0.18     |
| 118.93019 | 3330.7    | 0.23     |
| 199.9856  | 3145.7    | 0.22     |
| 243.7502  | 3125.9    | 0.21     |
| 318.2403  | 1458926.6 | 100      |
| 415.88837 | 3289.2    | 0.23     |
| 488.74048 | 3118.2    | 0.21     |
| 489.52222 | 3093.3    | 0.21     |

SPECTRUM - MS

Wendt\_Inclu\_list\_redo\_20160328\_33.raw

FTMS + p ESI d Full ms2 854.57@hcd37.50 [59.33-890.00]

Scan #: 12404

RT: 25.94

| m/z       | Intensity | Relative |
|-----------|-----------|----------|
| 60.08154  | 272955.2  | 6.27     |
| 66.37467  | 3910.2    | 0.09     |
| 71.07365  | 153522.7  | 3.53     |
| 77.83513  | 4474      | 0.1      |
| 86.09695  | 1509884.1 | 34.67    |
| 91.0545   | 7646.5    | 0.18     |
| 98.98453  | 125941.8  | 2.89     |
| 104.10738 | 113192.5  | 2.6      |
| 124.99995 | 1029790.1 | 23.65    |
| 146.80617 | 3930.5    | 0.09     |
| 184.07327 | 4354984   | 100      |
| 185.07668 | 7404.6    | 0.17     |
| 297.57477 | 7428.8    | 0.17     |
| 321.03336 | 3960.5    | 0.09     |
| 353.10272 | 4172.4    | 0.1      |
| 377.66391 | 5616.9    | 0.13     |
| 383.56705 | 4306.5    | 0.1      |
| 589.11615 | 4733.2    | 0.11     |
| 636.38177 | 17411.1   | 0.4      |
| 861.76257 | 4524.9    | 0.1      |
